# Supplementary material
Source: PubMed Central journal article supplement (PMC7891557)
Supplement: NIHMS1668582-supplement-1.pdf [file NIHMS1668582-supplement-1.pdf]

Figure S1

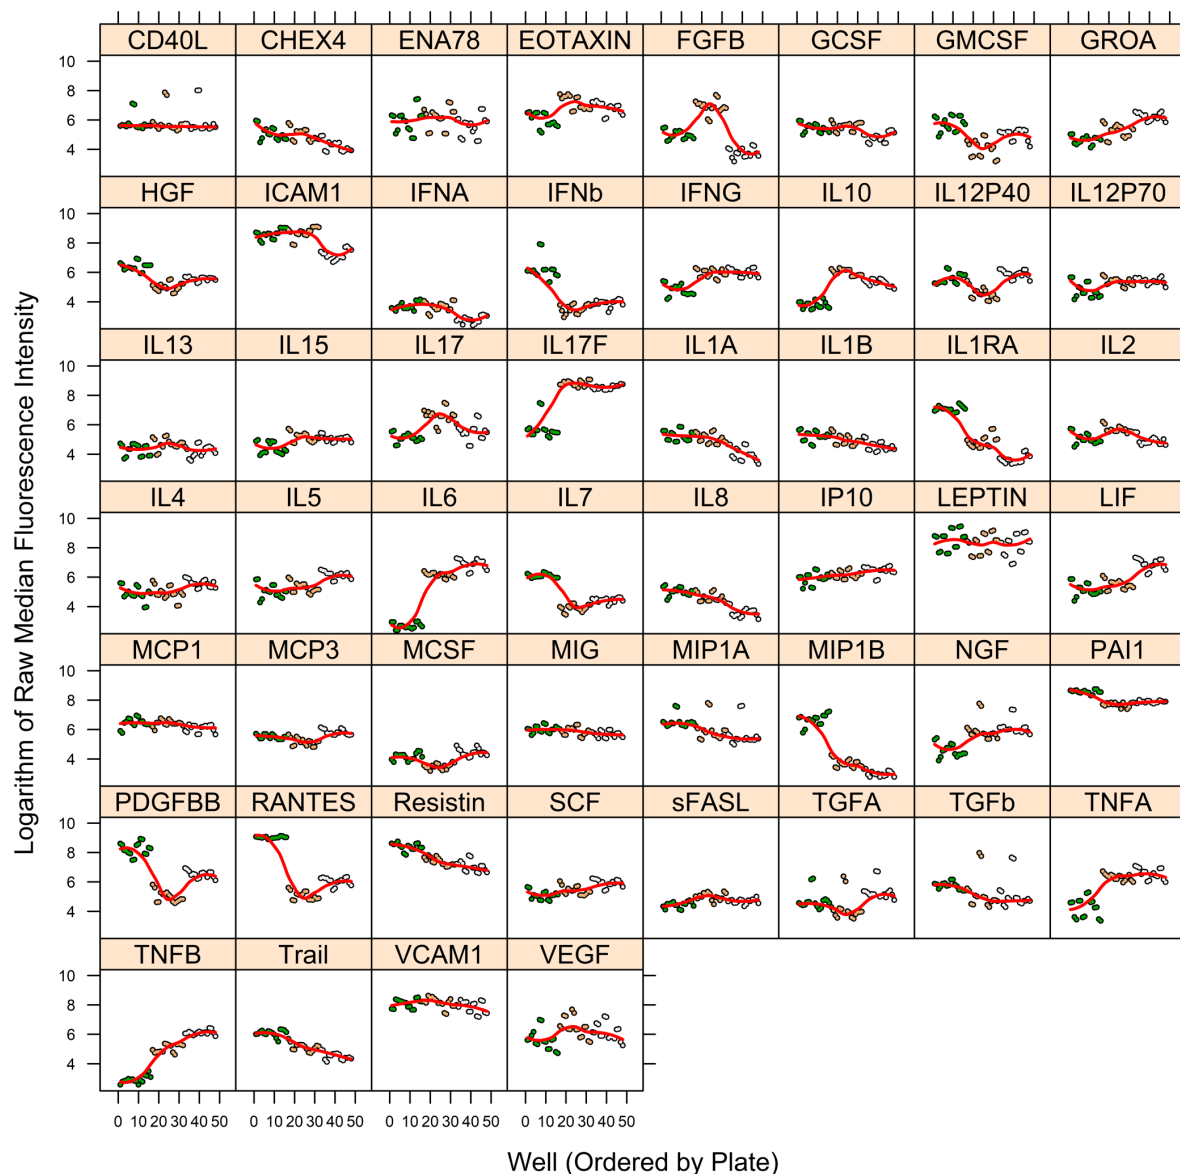

**Figure S1. MFI per well by cytokine *before* removal of lot and nonspecific binding artifacts, for lot experiment.** The vertical axis is MFI before removal of lot and nonspecific bindings artifacts and the horizontal axis is the ordering of wells (across lots). A separate figure is shown for each cytokine and for the NC microbeads (labeled “CHEX4”). Color coding of circles distinguishes wells from different lots. Red line within each figure is a spline smooth of trend in mean. Figure was prepared in R package `lattice` (18).

Figure S2.

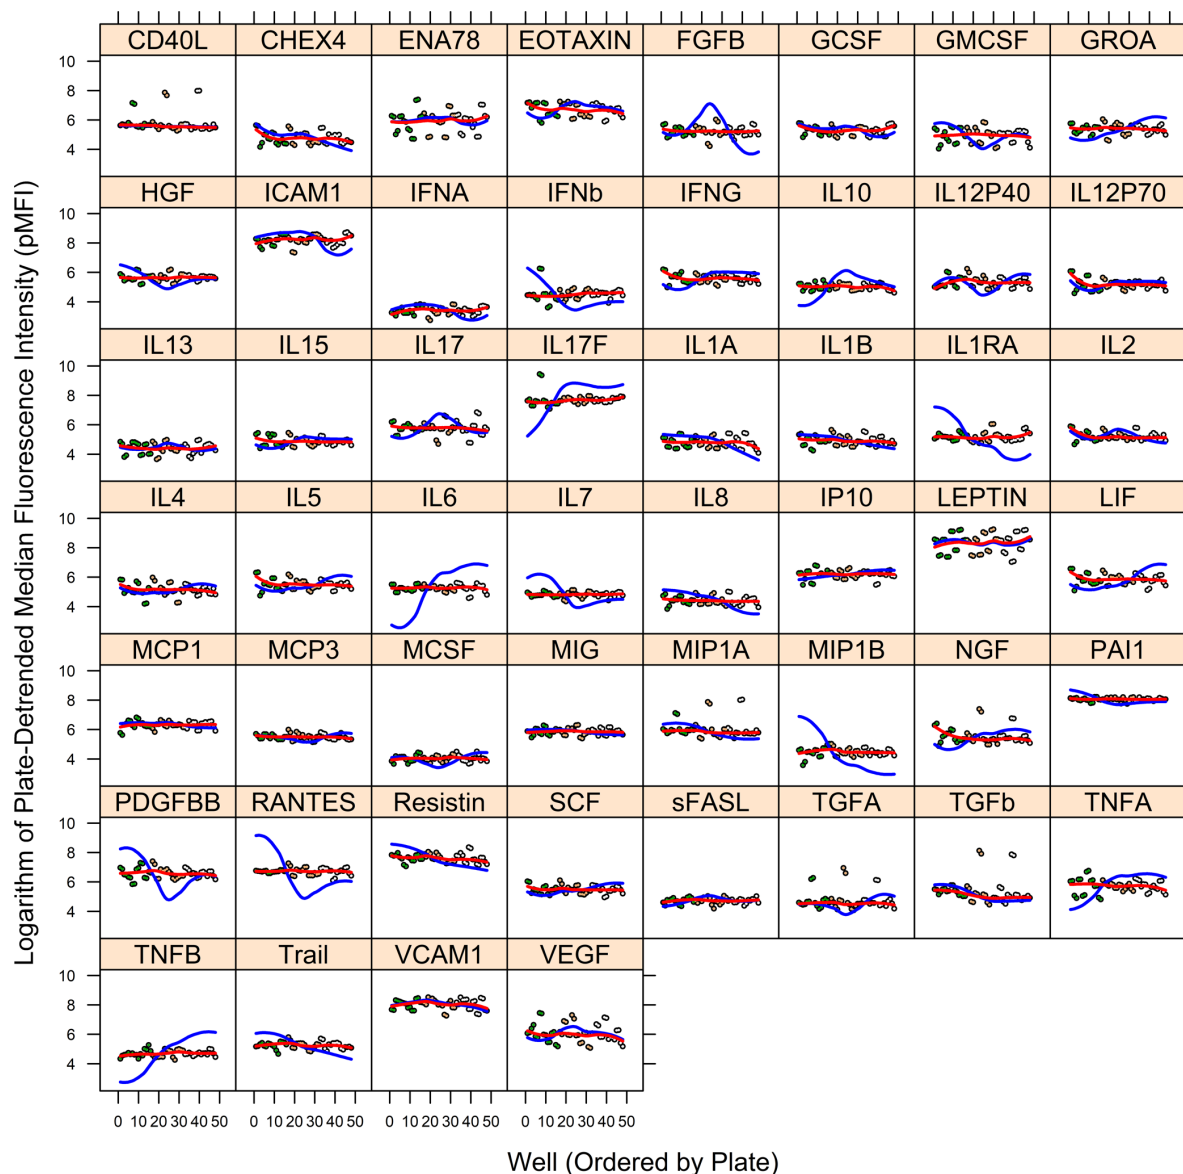

**Figure S2. MFI per well by cytokine *after* removal of lot artifacts (pMFI), for lot experiment.** The vertical axis is MFI after removal of lot artifacts (pMFI) and the horizontal axis is the ordering of wells (across lots). A separate figure is provided for each of the 51 cytokines plus the NC microbeads (labeled "CHEX4"). Color coding of circles distinguishes wells from different lots. Blue and red lines within each figure are spline smooths of trends in mean before and after removal of lot artifacts, respectively. Correction for lot artifact is substantial. Compare to the unprocessed data of Figure S1. Figure was prepared in R package `lattice` (18).

Figure S3.

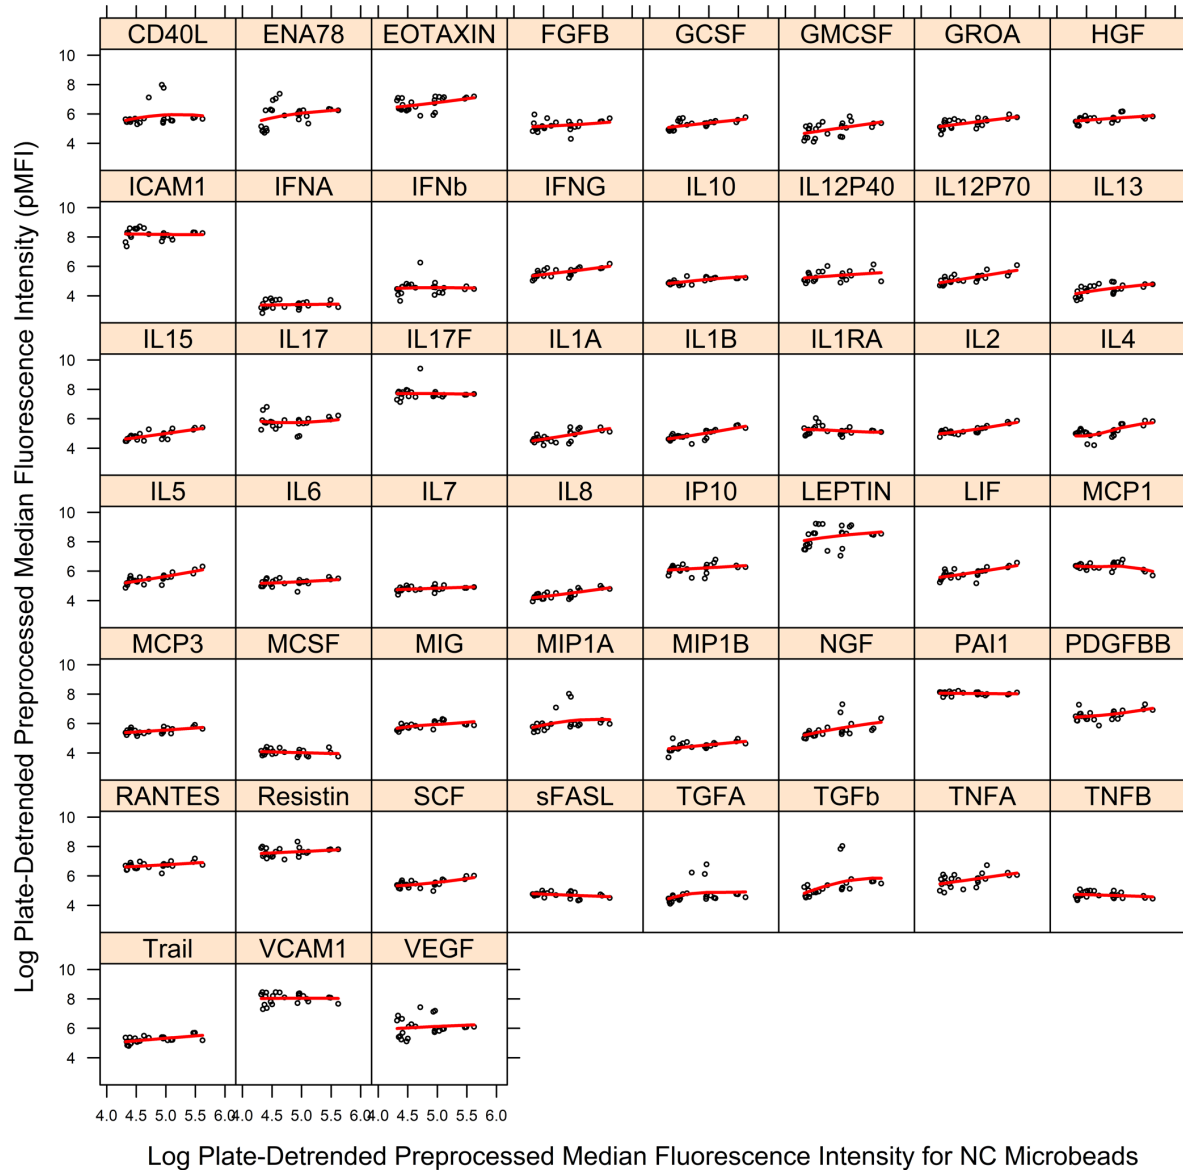

**Figure S3. Fit of regression model to pMFI data by cytokine for removal of nonspecific binding artifact, for lot experiment.** Vertical axis is pMFI for cytokine and horizontal axis is pMFI for NC microbeads (nonspecific binding). Black circles are observed pMFI data and red line is estimated local, error-in-variables regression curve. A separate figure is provided for each of the 51 cytokines. The *vertical* departures of observed pMFI values (black) from the regression curve (red) are estimates of pMFI corrected for nonspecific binding (dpMFI), where dpMFI is shown in Figure S4. Figure was prepared in R package `lattice` (18).

**Figure S4.**

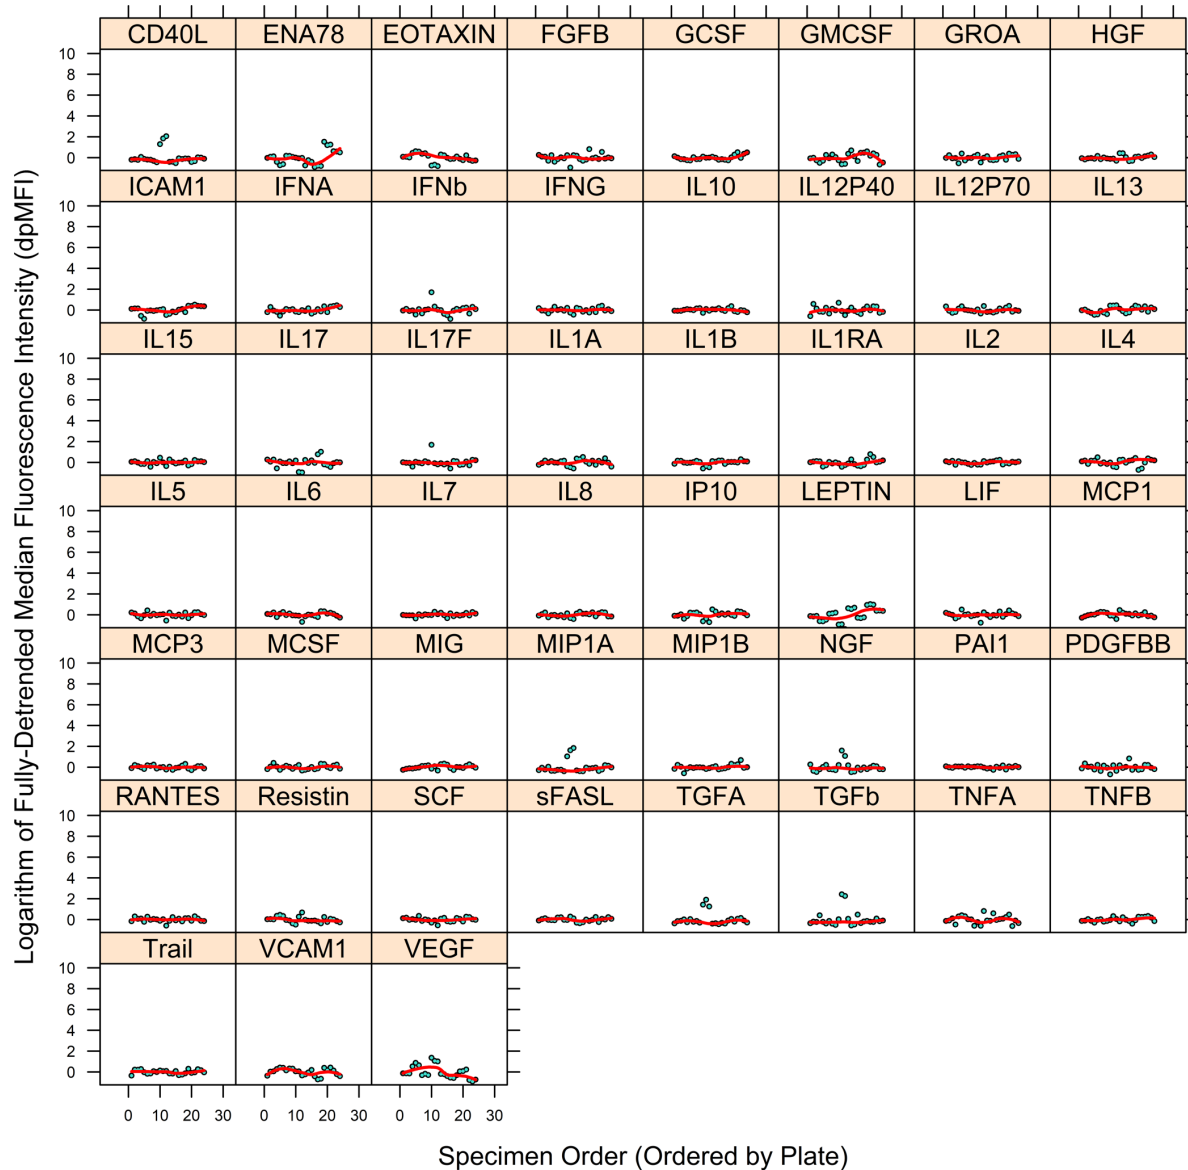

**Figure S4. Final output dataset for lot experiment.** Vertical axis is MFI after removal of lot and nonspecific-binding artifacts (dpMFI) for each cytokine and horizontal axis is the ordering of specimens (across lots). A separate figure is provided for each of the 51 cytokines. Red line within each figure is a spline smooth of trend in mean. Compare to the data (pMFI) prior to removal of nonspecific binding artifact (Figure S2). Figure was prepared in R package `lattice` (18).

**Figure S5.**

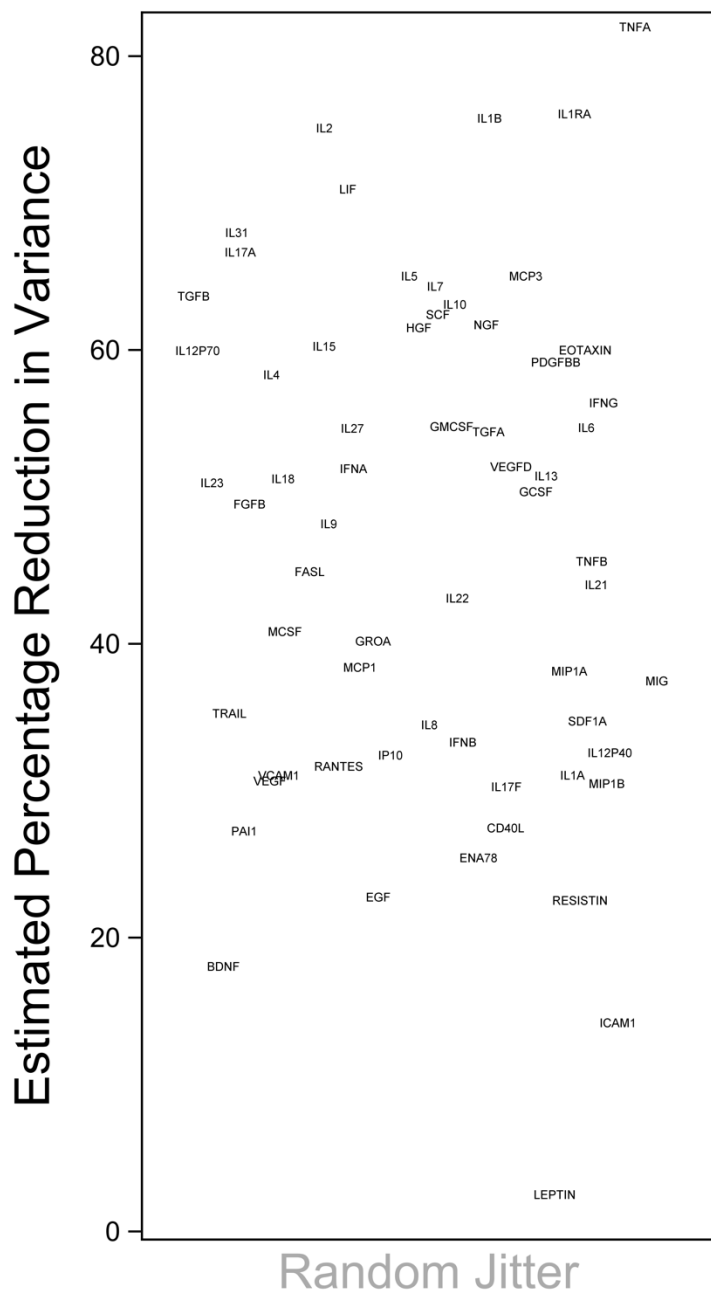

**Figure S5. Estimated percentage reduction in variance among specimens with correction for nonspecific binding, by cytokine, for PHAROS study.** Percentage variance reduction varies greatly among cytokines, due to differences in the relative proportion of signal contributed by nonspecific binding artifact. Figure was generated in SAS® ODS Graphics (SAS® Institute, Cary, North Carolina, USA).

**Figure S6.**

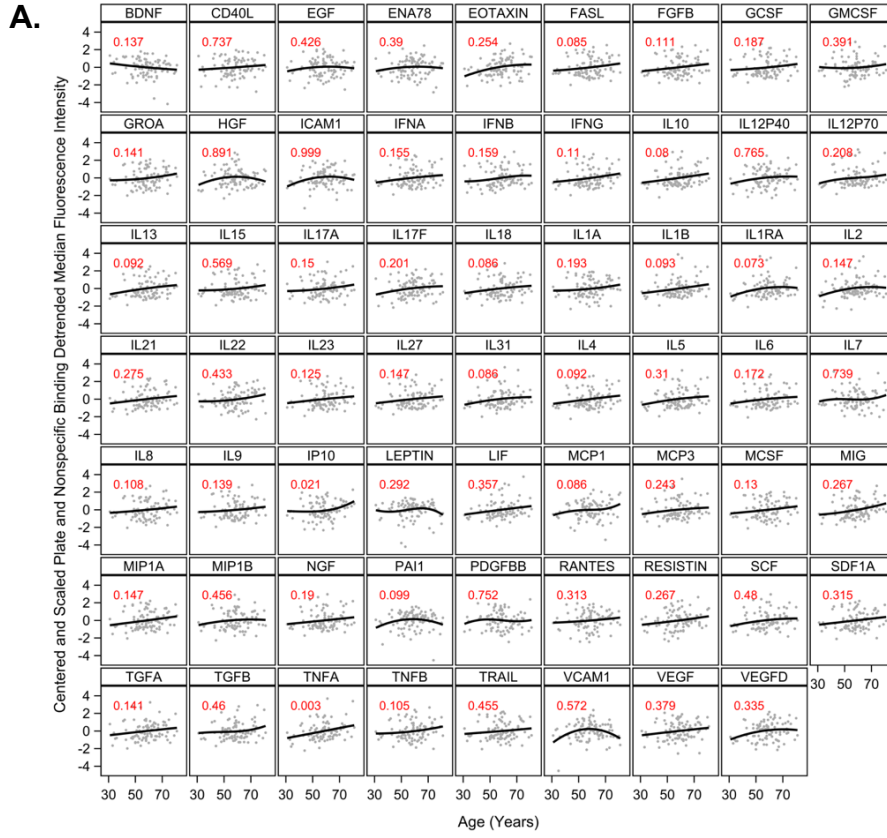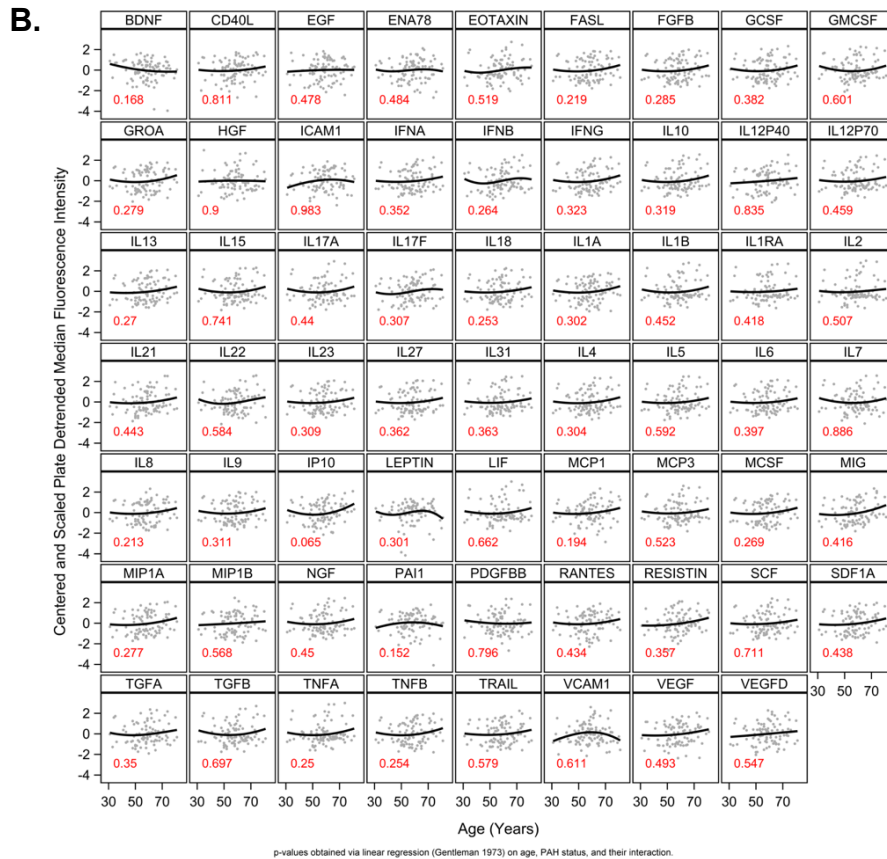

**Figure S6. Association between age and cytokine median fluorescence intensity with removal of plate artifact only versus removal of plate + nonspecific binding artifacts, for PHAROS study.** Panel A shows associations between age and cytokine MFI after plate artifact correction, while panel B shows associations between age and cytokine MFI after plate and nonspecific binding corrections. No cytokines show statistically significant associations with age after plate artifact correction alone; whereas two cytokines (IP-10 and TNFA) show statistically significant associations with age after plate + nonspecific binding corrections. Grey dots are observed data. Black line is a penalized b-spline smooth curve fit to these observed data. Red numbers are p-values from linear regression of variable on vertical axis on age, PAH status (yes/no), and their interaction, using the `orthoreg` procedure in SAS<sup>®</sup>/STAT (SAS<sup>®</sup> Institute, Cary, North Carolina, USA) applying the method of Gentleman, W.M. (1973). Least Squares Computations by Givens Transformations without Square Roots. *Journal of the Institute of Mathematics and Its Applications* 12:329-336. Figure, including smooth curves, was generated in SAS<sup>®</sup> ODS Graphics (SAS<sup>®</sup> Institute, Cary, North Carolina, USA).
